# Supplementary material for: “It’s Taboo to Talk About It”: Korean American Clergy Members’ Views of Mental Health
Source: Atypon-hosted journal article supplement (doi:10.1176/appi.ps.20220252), 2023-04-12
Supplement: appi.ps.20220252.ds001.pdf [file appi.ps.20220252.ds001.pdf]

### Semi-Structured Interview Guide

1. What do you believe are the primary concerns of Korean Americans who are of the 1.5 and later generations?
2. What are the top 3 social/emotional concerns your church members come to you with?
3. What role do you see your church playing in your community?
4. What kind of role should the church play in addressing emotional or mental health issues, if at all?
5. During sermons, Bible studies, or other church functions, do you ever talk about emotional troubles, family problems, substance abuse, domestic violence, or other mental health topics?
  - a. If so, how often?
  - b. If not, do you feel such topics should be discussed in the church?

### Vignette A

Ms. Ahn is a 26 year-old Korean American woman who was born in the United States to immigrant parents. She comes to your office and tells you that over the past month, she has had difficulty falling asleep at night and has struggled to concentrate on tasks at work. She feels tired all the time and has lost interest in hanging out with friends or going to the gym, activities she previously loved doing. She feels hopeless and admits to having thoughts of ending her life.

6. How would you approach Ms. Ahn's situation and begin helping her?

### Vignette B

Mr. Choi is a 40-year-old Korean American man who immigrated to the United States when he was 12 years old. He and his wife have been married for 13 years and they have 3 young children. The couple comes to you because of "family problems." Mr. Choi complains that his wife has been nagging him about his drinking. He admits that he has been drinking a little more than usual, but he has been stressed because of recent layoffs at work, and he doesn't think he has a "problem" – he only has a few beers a night at home and only goes out to drink with friends on the weekends.

7. How would you approach Mr. Choi's situation and begin helping him?
8. For either situation, is there a role for professional help?
9. Have you ever referred anyone in a similar situation for mental health treatment?
  - a. If so, what motivated you to do so?
    - i. What was your experience?
    - ii. How often do you refer church members?
  - b. Are there any difficulties or barriers to referring church members to a mental health professional? Any reasons you would not refer?
  - c. Do church members ever discuss difficulties they have had once they have been referred? Could you describe them?

10. What are the things that would be helpful for you and/or your church in addressing mental health?
11. What are ways mental health professionals can better serve you and your church?
12. Would you be interested in educational programs on mental health? Would your staff? Your church members?
13. Is there anything you would like to discuss further?
